# Supplementary material for: Impact of gender, albumin, and CYP2C19 polymorphisms on valproic acid in Chinese patients: a population pharmacokinetic model
Source: PubMed Central journal article supplement — J Int Med Res. 2020 Aug 31;48(8):0300060520952281. doi: 10.1177/0300060520952281 (PMC7469748; doi:10.1177/0300060520952281), 2020-08-31
Supplement: sj-pdf-1-imr-10.1177_0300060520952281.pdf [file sj-pdf-1-imr-10.1177_0300060520952281.pdf]

**Table S1. Summary of previously published VPA population pharmacokinetic model.**

| <b>PMID</b> | <b>Year</b> | <b>Patient</b> | <b>Sample size</b> | <b>Model</b> | <b>Covariates</b>                                                                                                        | <b>Country</b> |
|-------------|-------------|----------------|--------------------|--------------|--------------------------------------------------------------------------------------------------------------------------|----------------|
| 25751467    | 2015        | Children       | 80                 | -            | UGT1A6                                                                                                                   | India          |
| 26088889    | 2015        | Adult          | 102                | -            | UGT2B7                                                                                                                   | China          |
| 26484865    | 2015        | Adult          | 77                 | OCM          | SCN1A, sex, age, seizure type                                                                                            | Japan          |
| 27795544    | 2016        | Children       | 102                | -            | UGT2B7, UGT1A4                                                                                                           | China          |
| 28273397    | 2017        | Adult          | 279                | -            | CYP2C9, CYP2A6                                                                                                           | China          |
| 28280887    | 2017        | Children       | 96                 | OCM          | Body weight                                                                                                              | Belgium        |
| 28187395    | 2017        | Adult          | 20                 | TCM          | Previous VPA therapy, decontamination                                                                                    | Poland         |
| 28483293    | 2017        | Adult          | 206                | OCM          | Total daily dose, body weight                                                                                            | Thailand       |
| 29564480    | 2018        | Children       | 98                 | OCM          | Body weight, age, sex, height, body surface area, alanine transaminase, aspartate transaminase, liver and renal function | France         |
| 29724294    | 2018        | Adult          | 187                | -            | ABCC2                                                                                                                    | China          |
| 29666902    | 2018        | Children       | 290                | OCM          | CYP2C19, UGT1A8, UGT2B7, total daily dose, body surface area                                                             | China          |
| 29981400    | 2018        | Children       | 264                | OCM          | Body weight, co-administration, total daily dose, LEPR                                                                   | China          |
| 29340733    | 2018        | Children       | 182                | OCM          | UGT1A4, UGT2B7, UGT2B7                                                                                                   | China          |
| 30693367    | 2019        | Adult          | 354                | -            | SCN1A, SCN2A                                                                                                             | China          |

OCM: one compartment model; TCM: two compartment model; -: only the association between covariates and concentration was analyzed.

Table S2. Modeling process

| Scenario                                   | -2LL           | nPar<br>m | nOb<br>s | nSu<br>b | EpsShrinka<br>ge |
|--------------------------------------------|----------------|-----------|----------|----------|------------------|
| Base model                                 | 851.8131       | 5         | 98       | 60       | 0.47618          |
| <b>cstep001 V-GNDR</b>                     | <b>838.989</b> | 6         | 98       | 60       | 0.39418          |
| <b>cstep002 CI-GNDR</b>                    | 848.243        | 6         | 98       | 60       | 0.43147          |
| <b>cstep003 CI-AGE</b>                     | 850.8981       | 6         | 98       | 60       | 0.47448          |
| <b>cstep004 V-AGE</b>                      | 850.2853       | 6         | 98       | 60       | 0.47261          |
| <b>cstep005 V-WT</b>                       | 849.7784       | 6         | 98       | 60       | 0.46711          |
| <b>cstep006 V-BMI</b>                      | 851.667        | 6         | 98       | 60       | 0.47837          |
| <b>cstep007 CI-COM</b>                     | 851.6003       | 6         | 98       | 60       | 0.47391          |
| <b>cstep008 CI-CYP2C19</b>                 | <b>833.552</b> | 6         | 98       | 60       | 0.47078          |
| <b>cstep009 V-height</b>                   | 844.3429       | 6         | 98       | 60       | 0.43293          |
| <b>cstep010 CI-ALB</b>                     | <b>842.5</b>   | 6         | 98       | 60       | 0.46684          |
| <b>cstep011 CI-GLB</b>                     | 851.5863       | 6         | 98       | 60       | 0.47616          |
| <b>cstep012 CI-AST</b>                     | 851.3616       | 6         | 98       | 60       | 0.47535          |
| <b>cstep013 CI-ALT</b>                     | 850.6396       | 6         | 98       | 60       | 0.4753           |
| <b>cstep014 CI-SCR</b>                     | 851.1399       | 6         | 98       | 60       | 0.47792          |
| <b>cstep015 CI-TP</b>                      | 847.8778       | 6         | 98       | 60       | 0.47032          |
| <b>cstep016 V-GNDR CI-CYP2C19</b>          | 824.3447       | 7         | 98       | 60       | 0.40966          |
| <b>cstep017 CI-GNDR CI-CYP2C19</b>         | 831.0932       | 7         | 98       | 60       | 0.42736          |
| <b>cstep018 CI-AGE CI-CYP2C19</b>          | 832.978        | 7         | 98       | 60       | 0.46916          |
| <b>cstep019 V-AGE CI-CYP2C19</b>           | 831.511        | 7         | 98       | 60       | 0.46229          |
| <b>cstep020 V-WT CI-CYP2C19</b>            | 832.1008       | 7         | 98       | 60       | 0.46545          |
| <b>cstep021 V-BMI CI-CYP2C19</b>           | 833.4959       | 7         | 98       | 60       | 0.47259          |
| <b>cstep022 CI-COM CI-CYP2C19</b>          | 831.0177       | 7         | 98       | 60       | 0.45996          |
| <b>cstep023 CI-CYP2C19 V-height</b>        | 826.972        | 7         | 98       | 60       | 0.42991          |
| <b>cstep024 CI-CYP2C19 CI-ALB</b>          | 828.7074       | 7         | 98       | 60       | 0.4663           |
| <b>cstep025 CI-CYP2C19 CI-GLB</b>          | 833.4742       | 7         | 98       | 60       | 0.47036          |
| <b>cstep026 CI-CYP2C19 CI-AST</b>          | 833.385        | 7         | 98       | 60       | 0.46905          |
| <b>cstep027 CI-CYP2C19 CI-ALT</b>          | 832.9627       | 7         | 98       | 60       | 0.46948          |
| <b>cstep028 CI-CYP2C19 CI-SCR</b>          | 833.5325       | 7         | 98       | 60       | 0.47089          |
| <b>cstep029 CI-CYP2C19 CI-TP</b>           | 831.5171       | 7         | 98       | 60       | 0.46769          |
| <b>cstep030 V-GNDR CI-GNDR CI-CYP2C19</b>  | 822.6046       | 8         | 98       | 60       | 0.4031           |
| <b>cstep031 V-GNDR CI-AGE CI-CYP2C19</b>   | 823.6057       | 8         | 98       | 60       | 0.40766          |
| <b>cstep032 V-GNDR V-AGE CI-CYP2C19</b>    | 823.363        | 8         | 98       | 60       | 0.41498          |
| <b>cstep033 V-GNDR V-WT CI-CYP2C19</b>     | 823.9692       | 8         | 98       | 60       | 0.40439          |
| <b>cstep034 V-GNDR V-BMI CI-CYP2C19</b>    | 824.3426       | 8         | 98       | 60       | 0.4099           |
| <b>cstep035 V-GNDR CI-COM CI-CYP2C19</b>   | 821.5007       | 8         | 98       | 60       | 0.39909          |
| <b>cstep036 V-GNDR CI-CYP2C19 V-height</b> | 821.9963       | 8         | 98       | 60       | 0.39516          |
| <b>cstep037 V-GNDR CI-CYP2C19 CI-ALB</b>   | <b>817.623</b> | 8         | 98       | 60       | 0.39054          |
| <b>cstep038 V-GNDR CI-CYP2C19 CI-GLB</b>   | 824.1918       | 8         | 98       | 60       | 0.40961          |
| <b>cstep039 V-GNDR CI-CYP2C19 CI-AST</b>   | 824.2853       | 8         | 98       | 60       | 0.40893          |
| <b>cstep040 V-GNDR CI-CYP2C19 CI-ALT</b>   | 823.9395       | 8         | 98       | 60       | 0.40936          |

|                                                   |          |   |    |    |         |
|---------------------------------------------------|----------|---|----|----|---------|
| <b>cstep041 V-GNDR CI-CYP2C19 CI-SCR</b>          | 824.2773 | 8 | 98 | 60 | 0.41049 |
| <b>cstep042 V-GNDR CI-CYP2C19 CI-TP</b>           | 821.6247 | 8 | 98 | 60 | 0.3984  |
| <b>cstep043 V-GNDR CI-GNDR CI-CYP2C19 CI-ALB</b>  | 815.7674 | 9 | 98 | 60 | 0.38476 |
| <b>cstep044 V-GNDR CI-AGE CI-CYP2C19 CI-ALB</b>   | 817.5039 | 9 | 98 | 60 | 0.38923 |
| <b>cstep045 V-GNDR V-AGE CI-CYP2C19 CI-ALB</b>    | 817.1127 | 9 | 98 | 60 | 0.39385 |
| <b>cstep046 V-GNDR V-WT CI-CYP2C19 CI-ALB</b>     | 817.099  | 9 | 98 | 60 | 0.38569 |
| <b>cstep047 V-GNDR V-BMI CI-CYP2C19 CI-ALB</b>    | 817.6289 | 9 | 98 | 60 | 0.39009 |
| <b>cstep048 V-GNDR CI-COM CI-CYP2C19 CI-ALB</b>   | 815.442  | 9 | 98 | 60 | 0.38187 |
| <b>cstep049 V-GNDR CI-CYP2C19 V-height CI-ALB</b> | 815.2095 | 9 | 98 | 60 | 0.37967 |
| <b>cstep050 V-GNDR CI-CYP2C19 CI-ALB CI-GLB</b>   | 817.5908 | 9 | 98 | 60 | 0.38971 |
| <b>cstep051 V-GNDR CI-CYP2C19 CI-ALB CI-AST</b>   | 817.6014 | 9 | 98 | 60 | 0.38973 |
| <b>cstep052 V-GNDR CI-CYP2C19 CI-ALB CI-ALT</b>   | 817.5496 | 9 | 98 | 60 | 0.39026 |
| <b>cstep053 V-GNDR CI-CYP2C19 CI-ALB CI-SCR</b>   | 817.5351 | 9 | 98 | 60 | 0.38885 |
| <b>cstep054 V-GNDR CI-CYP2C19 CI-ALB CI-TP</b>    | 817.4676 | 9 | 98 | 60 | 0.39051 |
| <b>cstep055 V-GNDR CI-ALB</b>                     | 827.0672 | 7 | 98 | 60 | 0.3758  |
